# Supplementary material for: Fungi in Thailand: A Case Study of the Efficacy of an ITS Barcode for Automatically Identifying Species within the Annulohypoxylon and Hypoxylon Genera
Source: PubMed Central journal article supplement (PMC3563529; doi:10.1371/journal.pone.0054529), 2013-02-04

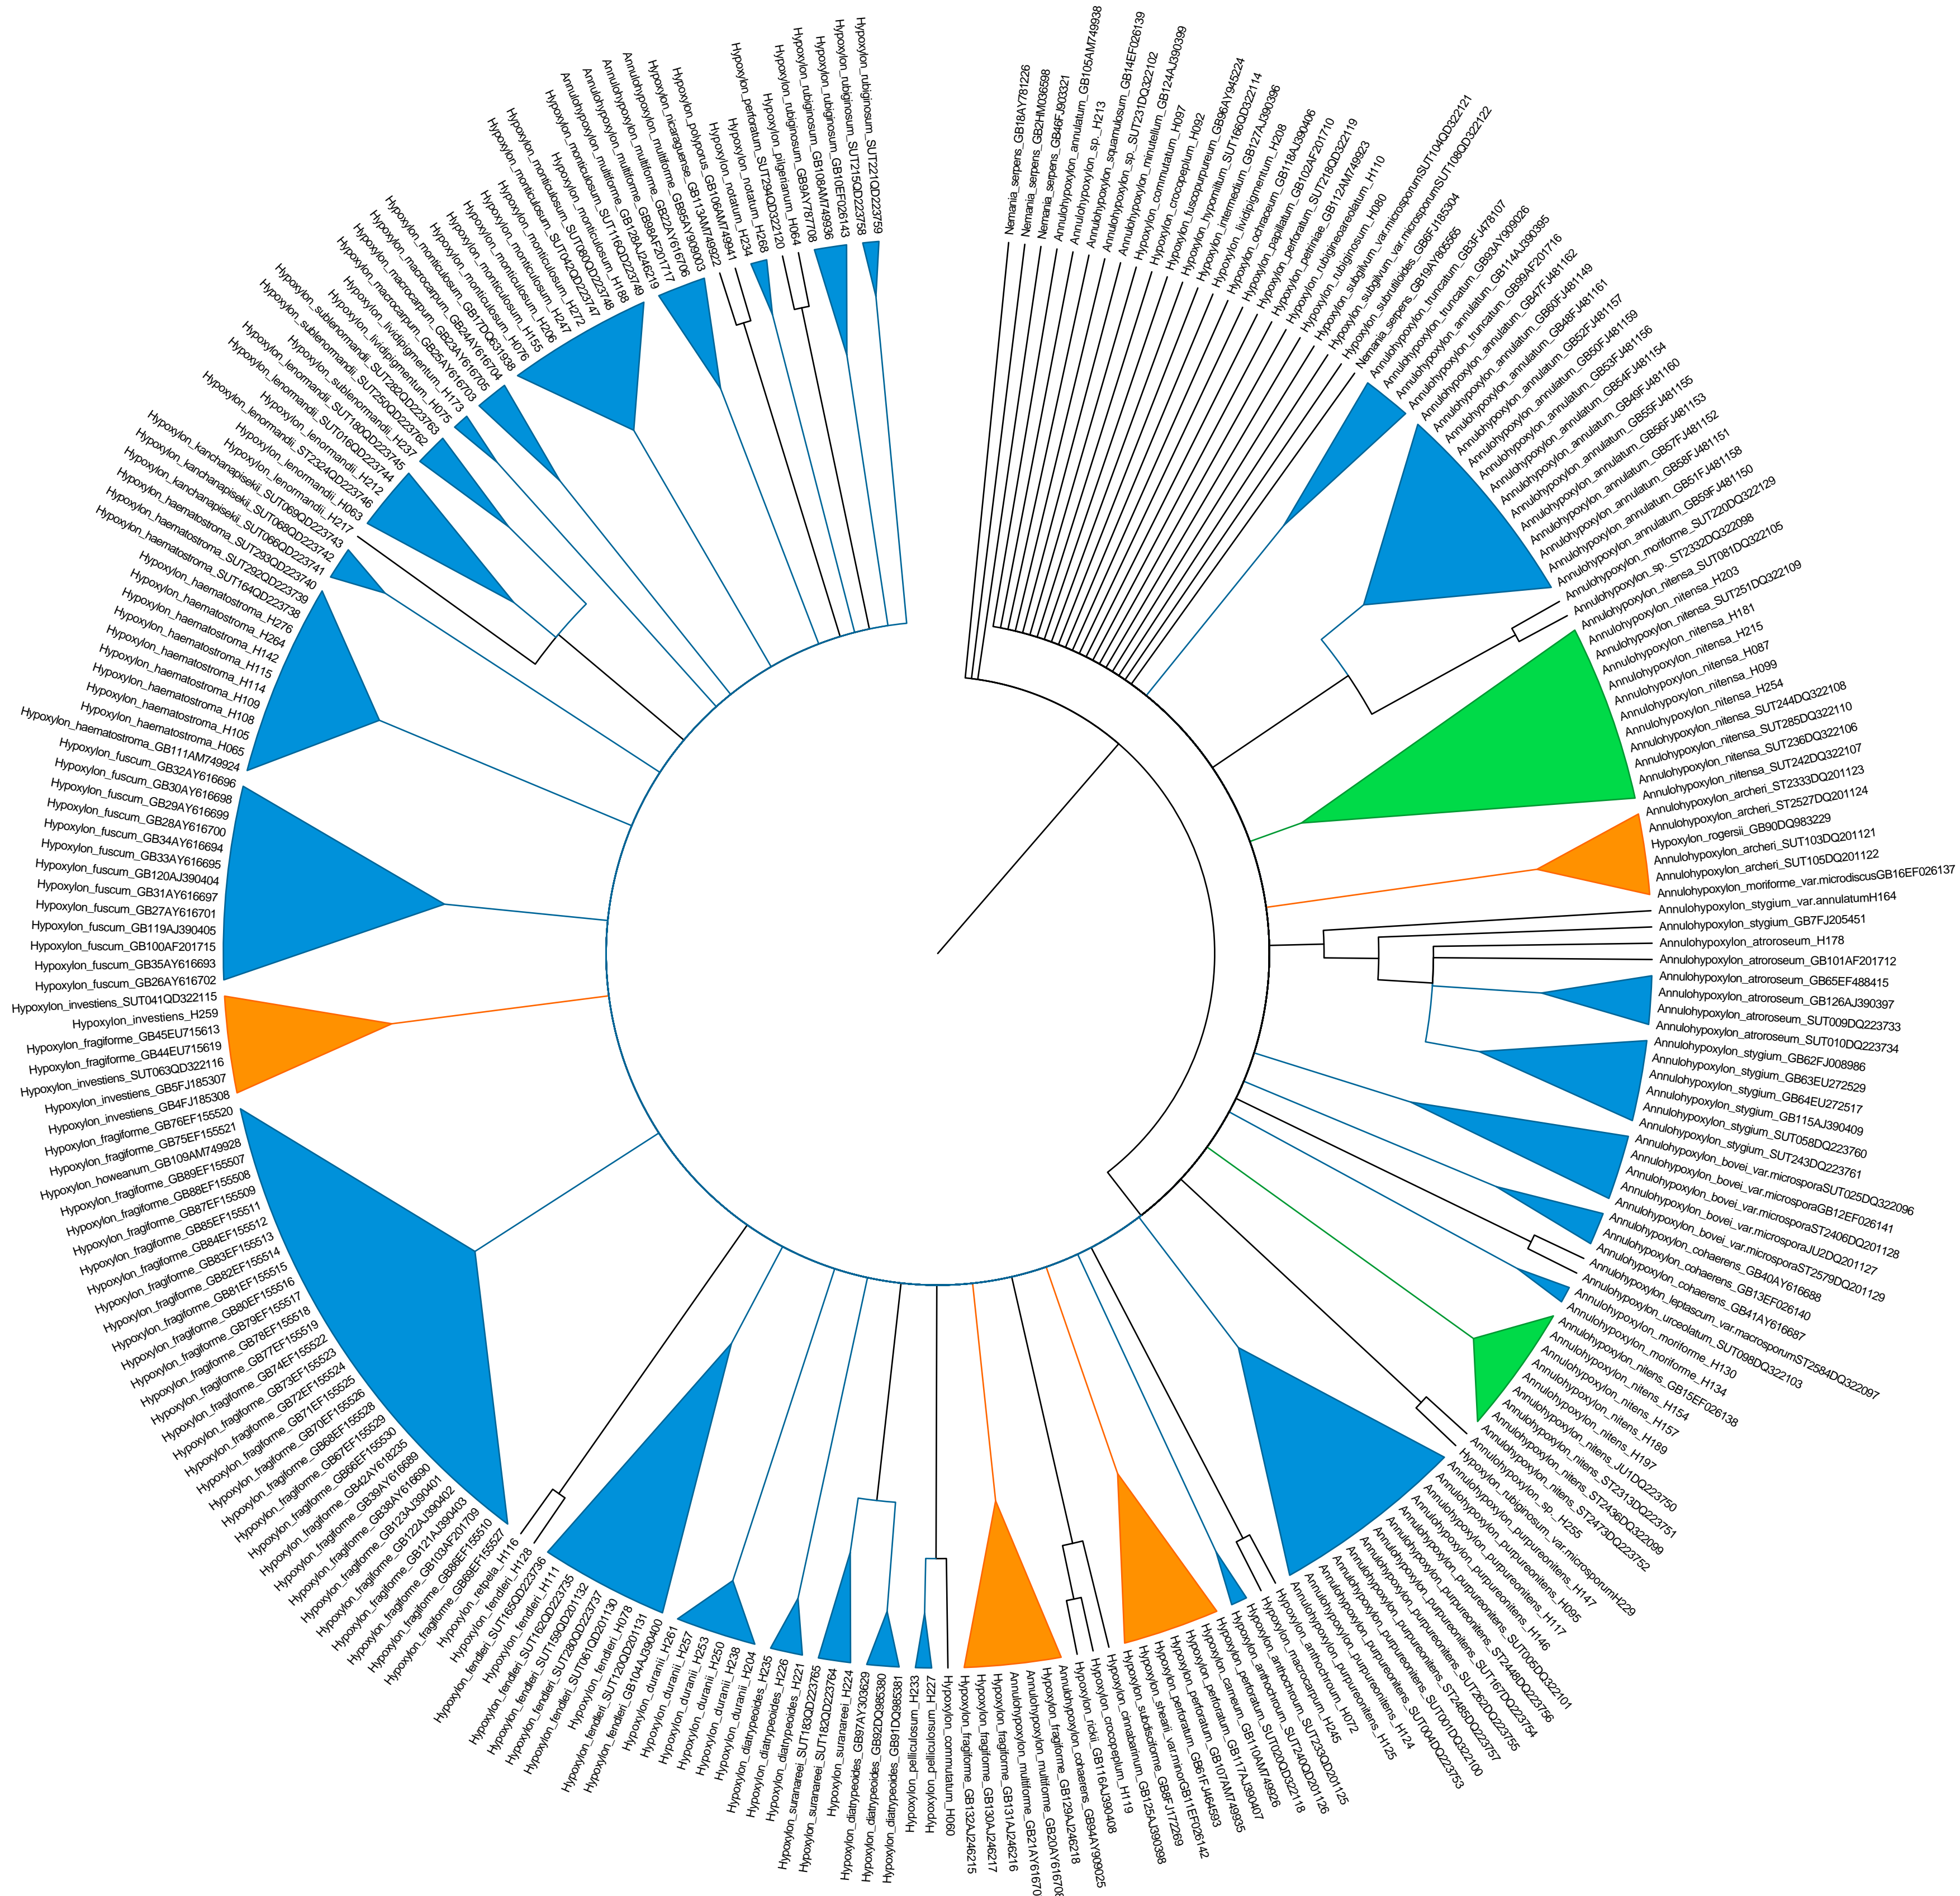

Supplement: pone.0054529.s002.pdf [file pone.0054529.s002.pdf]
